# Supplementary material for: Comparison of Various Solvent Extracts and Major Bioactive Components from Unsalt-Fried and Salt-Fried Rhizomes of Anemarrhena asphodeloides for Antioxidant, Anti-α-Glucosidase, and Anti-Acetylcholinesterase Activities
Source: MDPI journal article supplement (doi:10.3390/antiox11020385), 2022-02-14
Supplement: s1 [file s1]

## Supplementary data

### **Comparison of Various Solvent Extracts and Major Bioactive Components from Unsalt-fried and Salt-fried Rhizomes of *Anemarrhena asphodeloides* for Antioxidant, Anti- $\alpha$ -Glucosidase, and Anti-Acetylcholinesterase Activities**

**Yi-Cheng Chu <sup>1</sup>, Chang-Syun Yang <sup>2</sup>, Ming-Jen Cheng <sup>3</sup>, Shu-Ling Fu <sup>1,\*</sup> and Jih-Jung Chen <sup>1,2,4,\*</sup>**

<sup>1</sup> Institute of Traditional Medicine, School of Medicine, National Yang Ming Chiao Tung University, Taipei 112, Taiwan; chuyc.md07@nycu.edu.tw (Y.-C.C.)

<sup>2</sup> Department of Pharmacy, School of Pharmaceutical Sciences, National Yang Ming Chiao Tung University, Taipei 112, Taiwan; tim0619@nycu.edu.tw (C.-S.Y.)

<sup>3</sup> Bioresource Collection and Research Center (BCRC), Food Industry Research and Development Institute (FIRDI), Hsinchu 300, Taiwan; cmj@firdi.org.tw (M.-J.C.)

<sup>4</sup> Department of Medical Research, China Medical University Hospital, China Medical University, Taichung 404, Taiwan

\* Correspondence: jjungchen@nycu.edu.tw (J.-J.C.); slfu@nycu.edu.tw (S.-L.F.); Tel.: +886-2-2826-7195 (J.-J.C.); +886-2-2826-7177 (S.-L.F.); Fax: +886-2-2823-2940 (J.-J.C.); +886-2-2822-5044 (S.-L.F.)

## Contents

|                                                                                                                                                        |    |
|--------------------------------------------------------------------------------------------------------------------------------------------------------|----|
| Table S1. Retention time, LODs, LOQs, and regression analysis for three components of <i>Anemarrhena asphodeloides</i> (AA) in reverse-phase HPLC..... | S3 |
| Figure S1. Reverse-phase HPLC chromatogram of isolated pure compounds.....                                                                             | S3 |
| Figure S2. Reverse-phase HPLC chromatogram of methanol extract in AA.....                                                                              | S3 |
| Figure S3. Reverse-phase HPLC chromatogram of ethanol extract in AA.....                                                                               | S4 |
| Figure S4. Reverse-phase HPLC chromatogram of acetone extract in AA.....                                                                               | S4 |
| Figure S5. Reverse-phase HPLC chromatogram of ethyl acetate extract in AA.....                                                                         | S4 |
| Figure S6. Reverse-phase HPLC chromatogram of CH <sub>2</sub> Cl <sub>2</sub> extract in AA.....                                                       | S5 |
| Figure S7. Reverse-phase HPLC chromatogram of <i>n</i> -hexane extract in AA.....                                                                      | S5 |
| Figure S8. Reverse-phase HPLC chromatogram of water extract in AA.....                                                                                 | S5 |
| Figure S9. Reverse-phase HPLC chromatogram of methanol extract in salt-fried AA.....                                                                   | S6 |
| Figure S10. Reverse-phase HPLC chromatogram of ethanol extract in salt-fried AA.....                                                                   | S6 |
| Figure S11. Reverse-phase HPLC chromatogram of acetone extract in salt-fried AA.....                                                                   | S6 |
| Figure S12. Reverse-phase HPLC chromatogram of ethyl acetate extract in salt-fried AA....                                                              | S7 |
| Figure S13. Reverse-phase HPLC chromatogram of CH <sub>2</sub> Cl <sub>2</sub> extract in salt-fried AA.....                                           | S7 |
| Figure S14. Reverse-phase HPLC chromatogram of <i>n</i> -hexane extract in salt-fried AA.....                                                          | S7 |
| Figure S15. Reverse-phase HPLC chromatogram of <i>n</i> -hexane extract in salt-fried AA.....                                                          | S8 |

**Table S1.** Retention time, LODs, LOQs, and regression analysis for four components of *Anemarrhena asphodeloides* (AA) in reverse-phase HPLC.

| Compounds        | T <sub>m</sub> (min) <sup>a</sup> | Regression equation    | Correlation coefficient | LOD (μg/mL) <sup>a</sup> | LOQ (μg/mL) <sup>a</sup> |
|------------------|-----------------------------------|------------------------|-------------------------|--------------------------|--------------------------|
| Neomangiferin    | 28.23                             | $y = 32979x + 5.8829$  | 0.9999                  | 0.18                     | 0.56                     |
| Timosaponin AIII | 31.37                             | $y = 1.3673x - 1.6725$ | 0.9999                  | 0.20                     | 0.48                     |
| Isomangiferin    | 33.25                             | $y = 4.1050x - 2.0690$ | 0.9998                  | 0.10                     | 0.43                     |
| Mangiferin       | 59.82                             | $y = 3.7650x + 5.2980$ | 0.9997                  | 0.16                     | 0.50                     |

<sup>a</sup> T<sub>m</sub>: Retention time; LOD: Limit of detection; LOQ: Limit of quantification

(A) Neomangiferin (500 μL), 280 nm

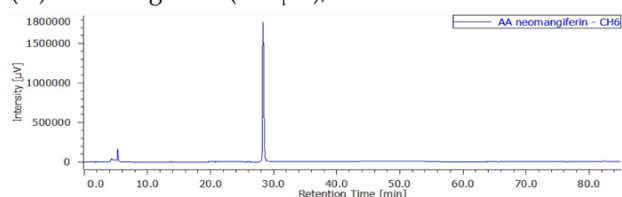

(B) Timosaponin A-III (500 μL), 280 nm

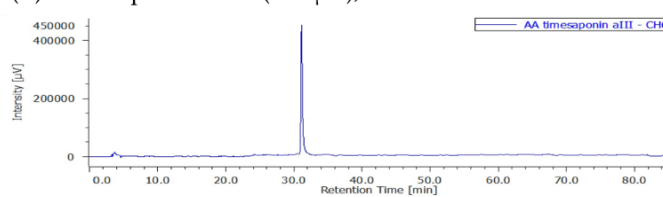

(C) Isomangiferin (500 μL), 280 nm

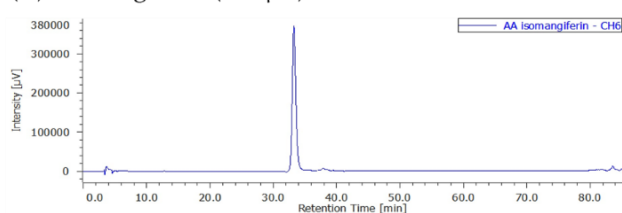

(D) Mangiferin (500 μL), 280 nm

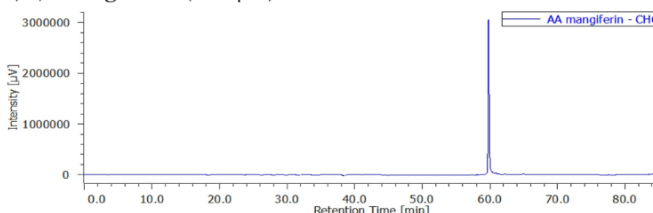

**Figure S1.** Reverse-phase HPLC chromatogram of isolated pure compounds (A to D).

Methanol (500 μL), 280 nm

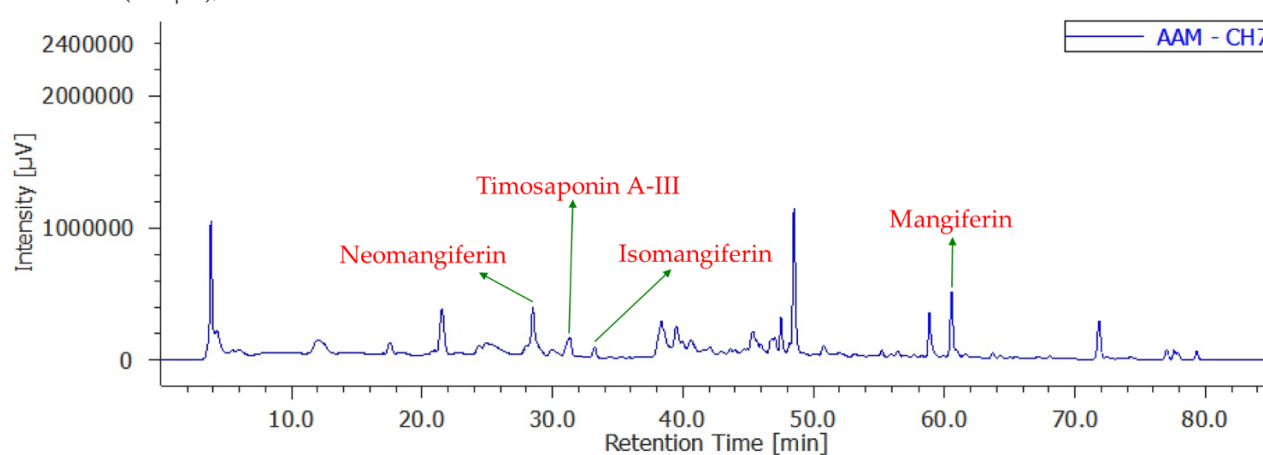

**Figure S2.** Reverse-phase HPLC chromatogram of methanol extract in AA.

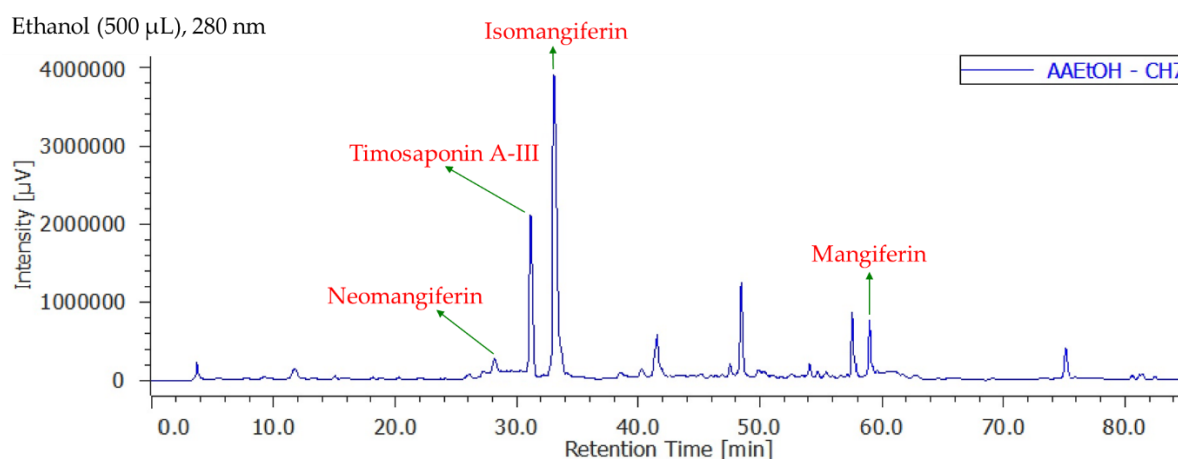

Figure S3. Reverse-phase HPLC chromatogram of ethanol extract in AA.

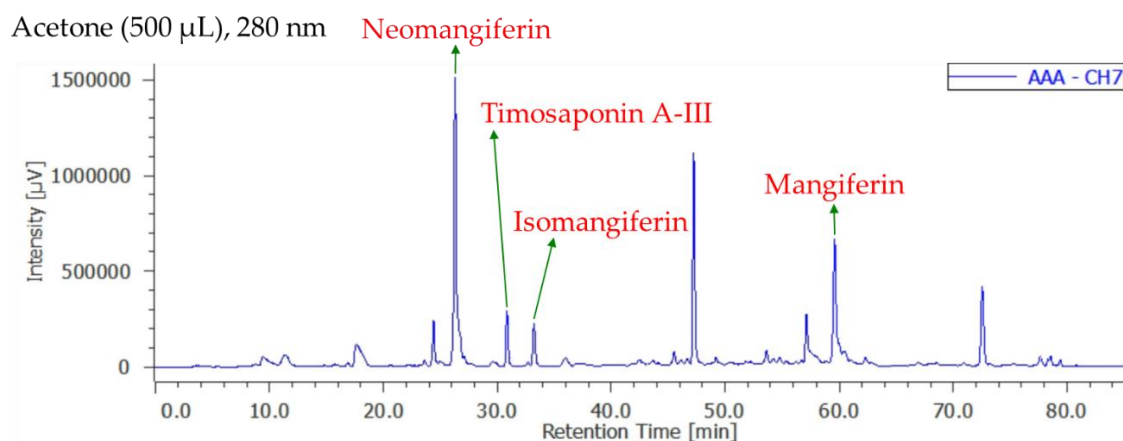

Figure S4. Reverse-phase HPLC chromatogram of acetone extract in AA.

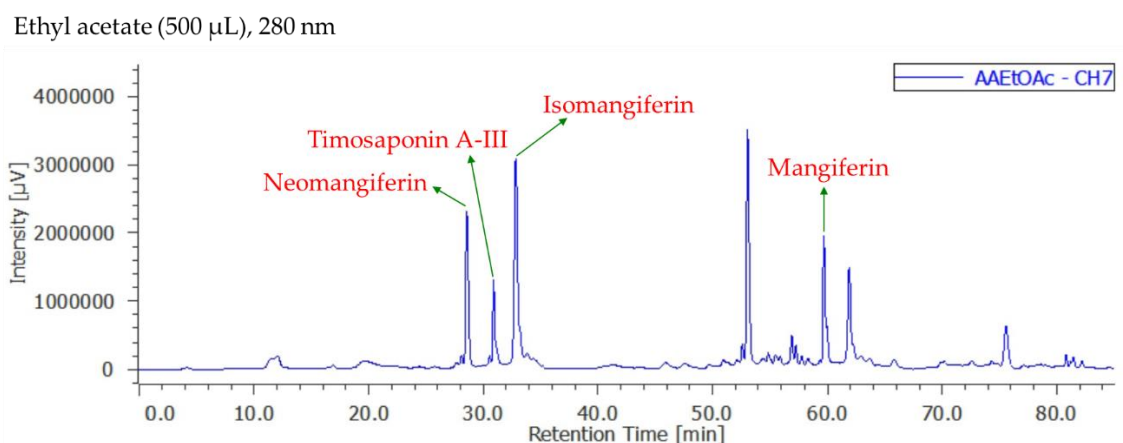

Figure S5. Reverse-phase HPLC chromatogram of ethyl acetate extract in AA.

Dichloromethane (500  $\mu$ L), 280 nm

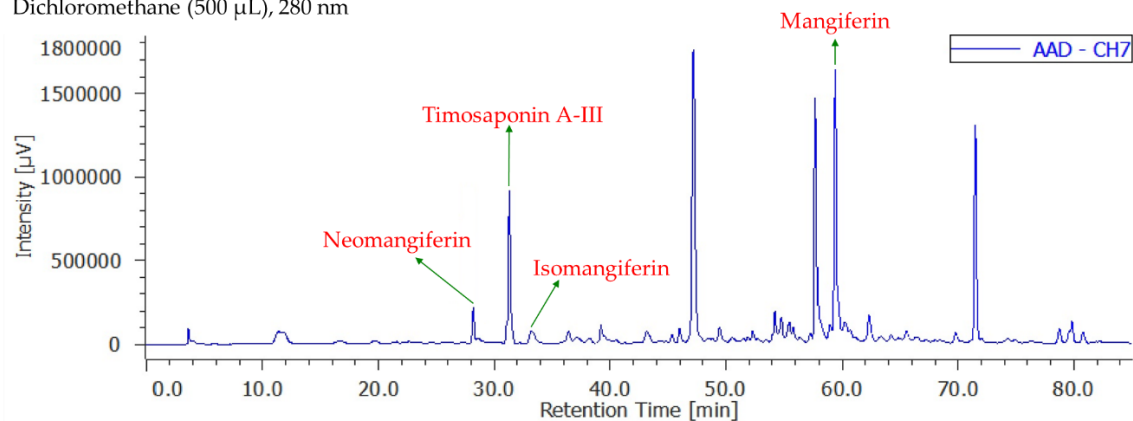

Figure S6. Reverse-phase HPLC chromatogram of dichloromethane extract in AA.

*n*-Hexane (500  $\mu$ L), 280 nm

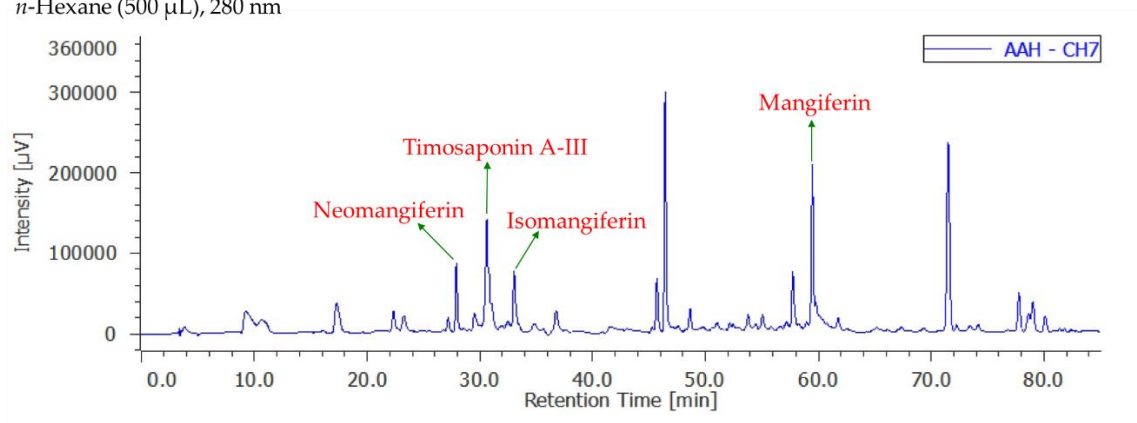

Figure S7. Reverse-phase HPLC chromatogram of *n*-hexane extract in AA.

Water (500  $\mu$ L), 280 nm

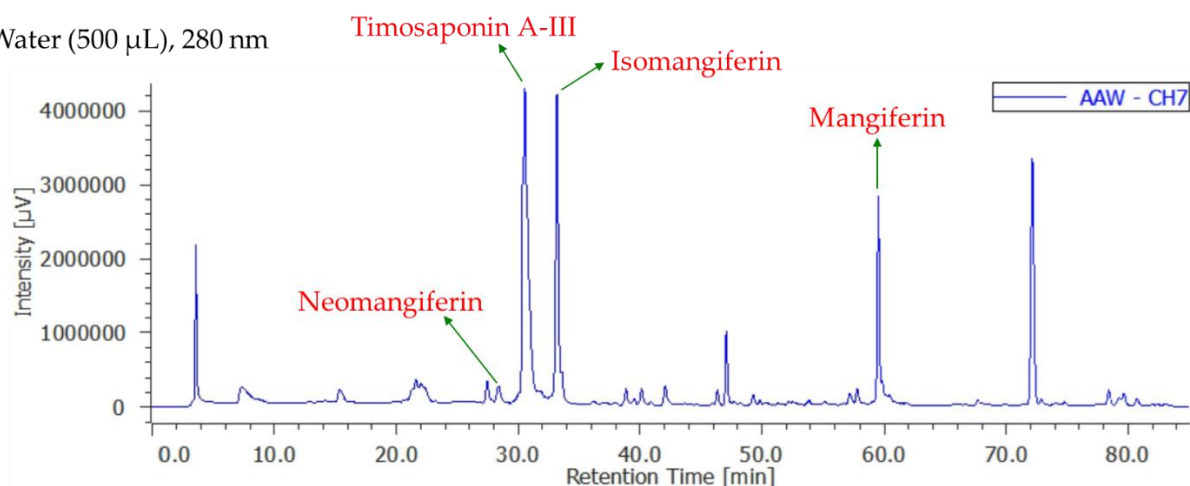

Figure S8. Reverse-phase HPLC chromatogram of water extract in AA.

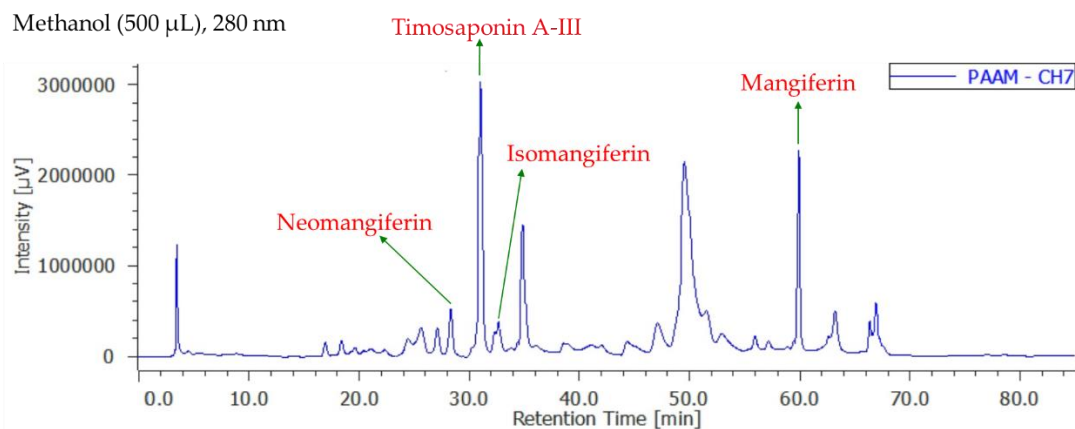

Figure S9. Reverse-phase HPLC chromatogram of methanol extract in salt-fried AA.

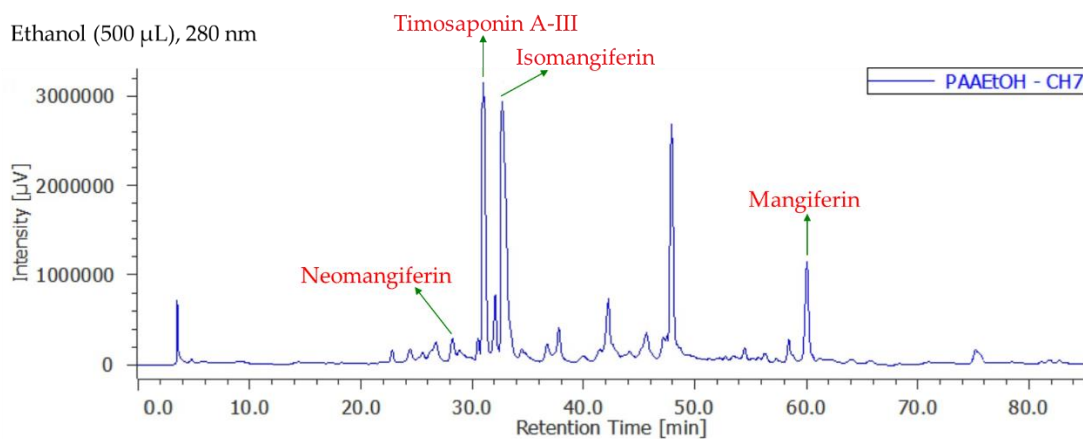

Figure S10. Reverse-phase HPLC chromatogram of ethanol extract in salt-fried AA.

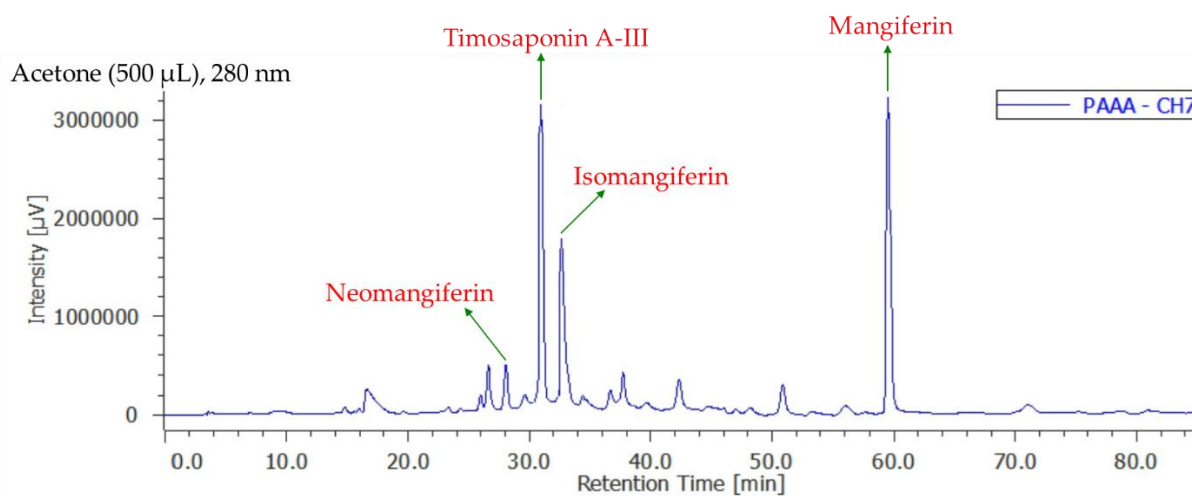

Figure S11. Reverse-phase HPLC chromatogram of acetone extract in salt-fried AA.

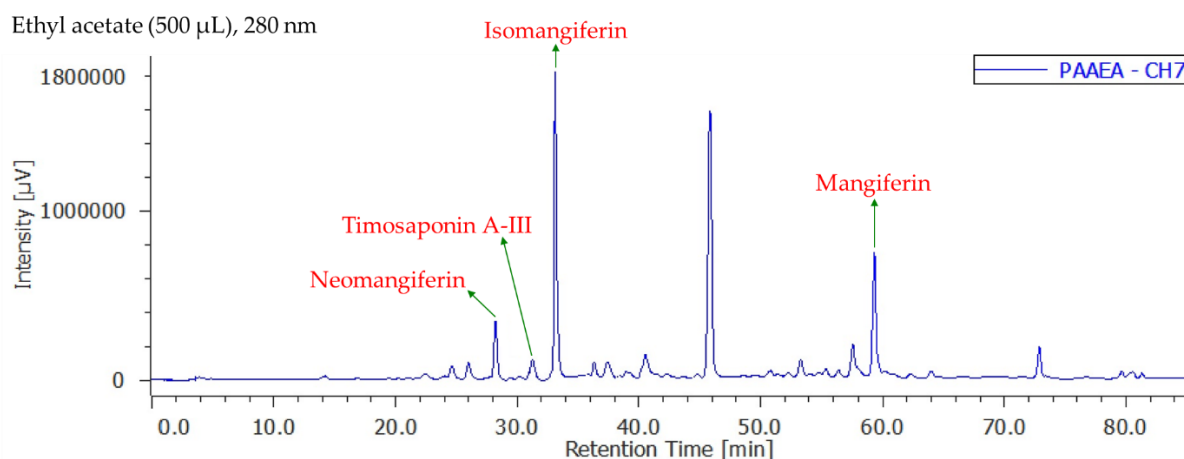

Figure S12. Reverse-phase HPLC chromatogram of ethyl acetate extract in salt-fried AA.

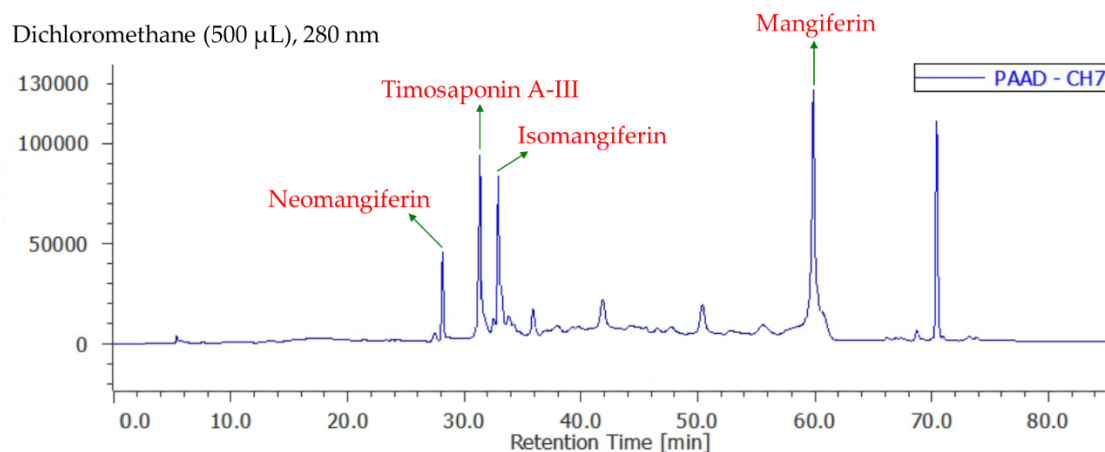

Figure S13. Reverse-phase HPLC chromatogram of dichloromethane extract in salt-fried AA.

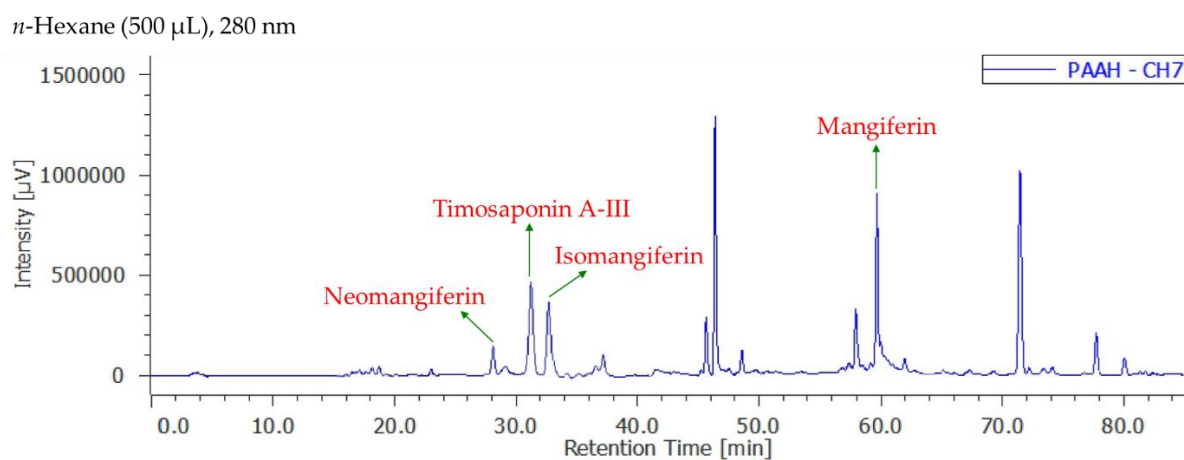

Figure S14. Reverse-phase HPLC chromatogram of *n*-hexane extract in salt-fried AA.

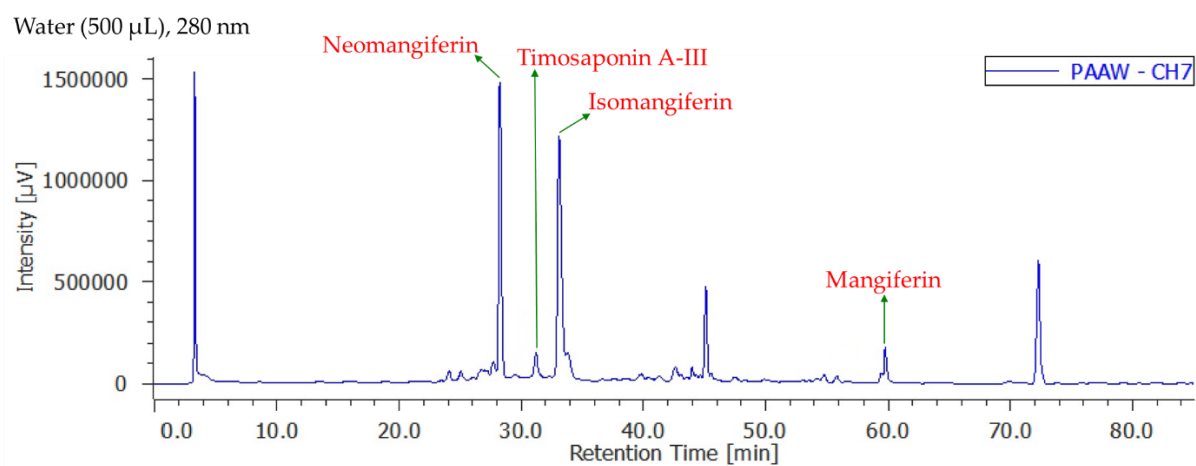

Figure S15. Reverse-phase HPLC chromatogram of water extract in salt-fried AA.
